# Supplementary material
Source: ML conference proceedings conference paper supplement (https://openreview.net/forum?id=2ulXbPXISP)

Maximum certifiable radius for  $p_{Isotropic} = 0.15$ 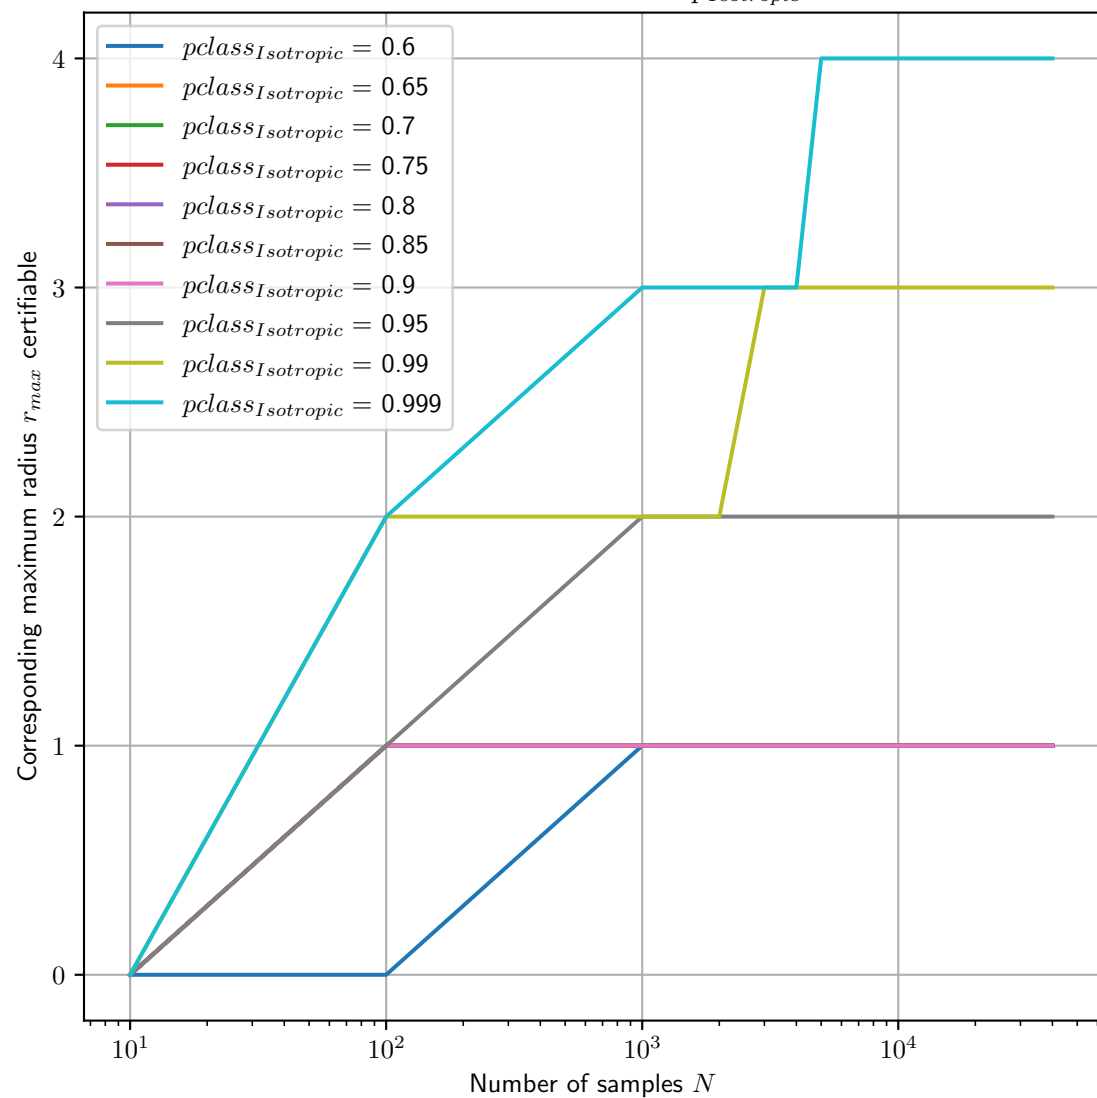Maximum certifiable radius for  $p_{Isotropic} = 0.2$ 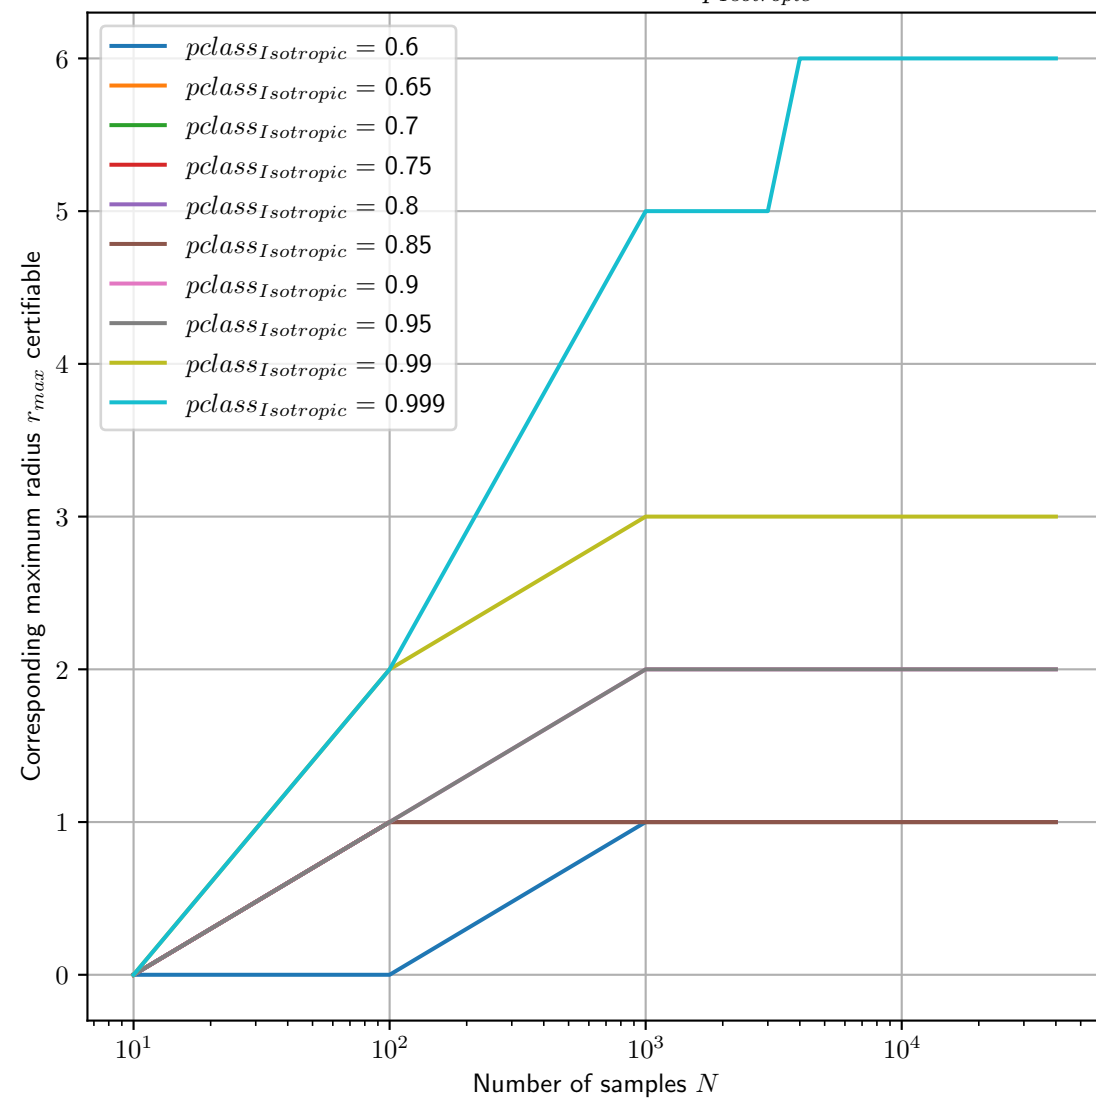Maximum certifiable radius for  $p_{Isotropic} = 0.3$ 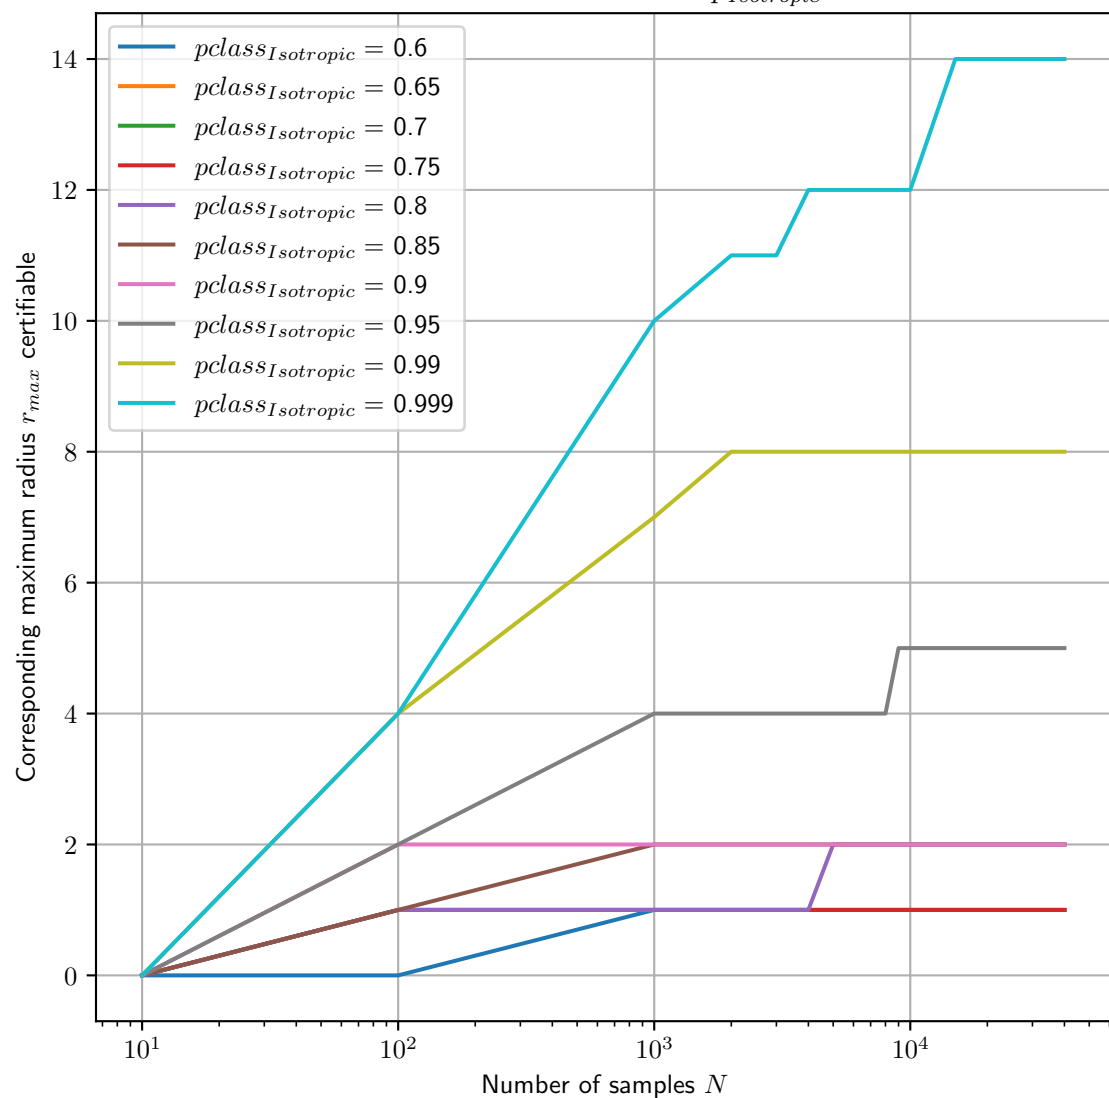Maximum certifiable radius for  $p_{Isotropic} = 0.35$ 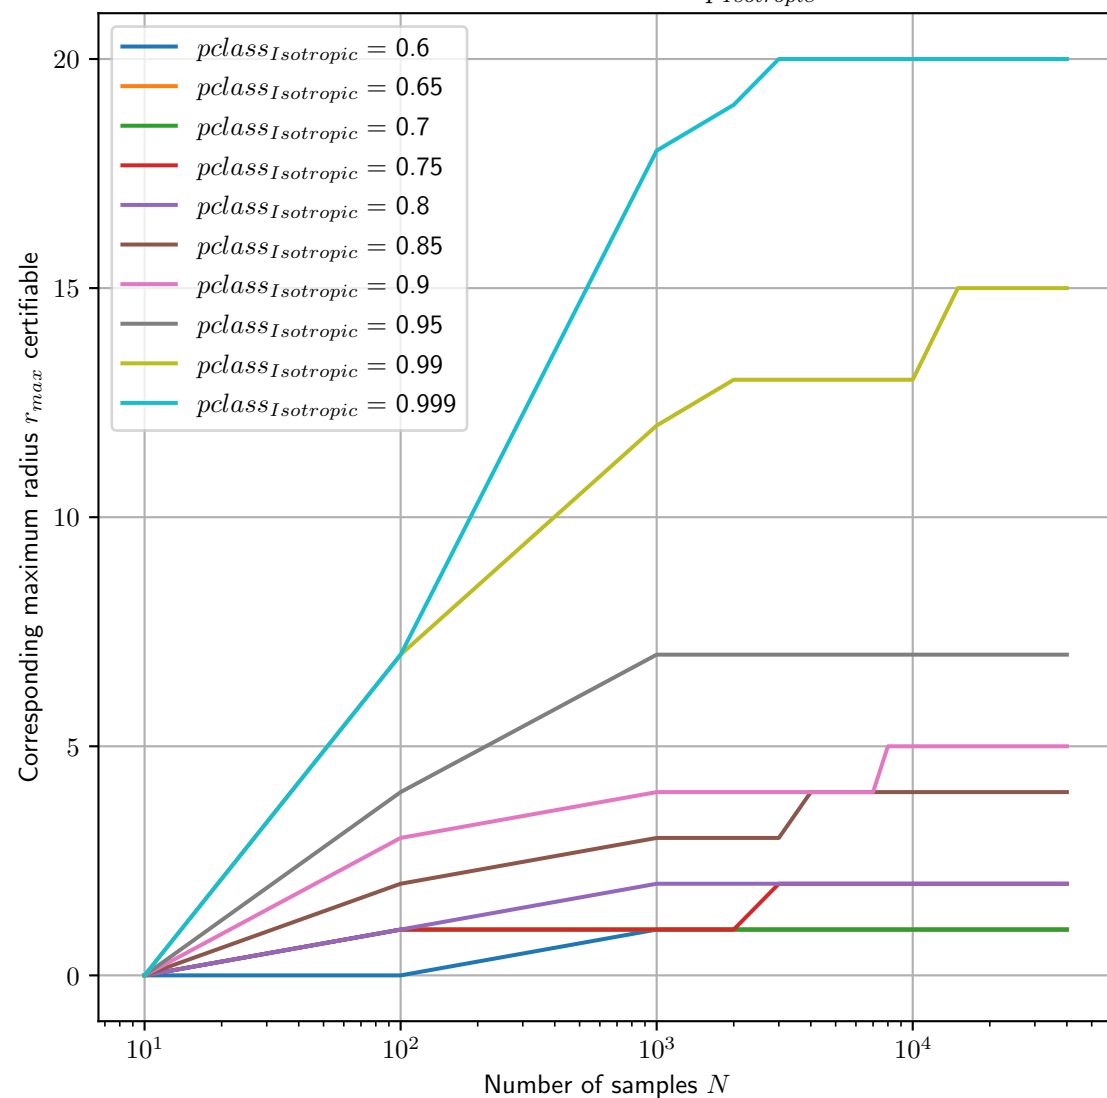

Supplement: supplementary_material [file attachment]
