# Supplementary material
Source: ML conference proceedings conference paper supplement (https://openreview.net/forum?id=2ulXbPXISP)
Supplement: supplementary_material [file attachment]

$$\epsilon_{i,j} \sim \text{Bern}(p_k), (i,j) \in \mathcal{C}_k$$

This matrix binary entries, whose probability to be one is proportional to the darkness of the entry.

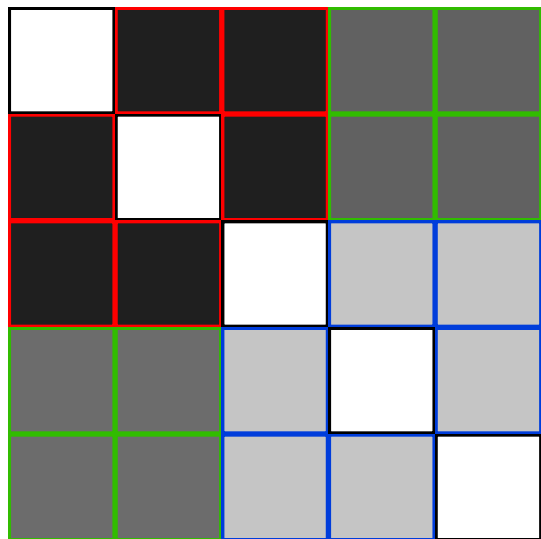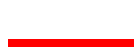
 $\mathcal{C}_1$ 
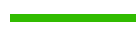
 $\mathcal{C}_2$ 
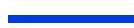
 $\mathcal{C}_3$ 

Modulo 2 Addition

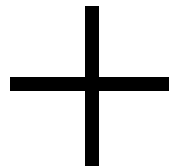

Adjacency Matrix

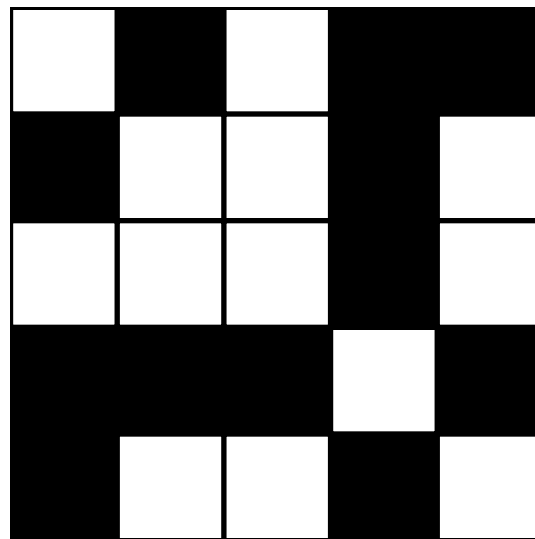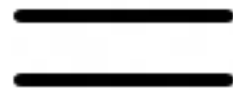
 $\tilde{\mathcal{G}}$
