# Supplementary material
Source: ML conference proceedings conference paper supplement (https://openreview.net/forum?id=2ulXbPXISP)
Supplement: supplementary_material [file attachment]

---

# Structure-Aware Robustness Certificates for Graph Classification (Supplementary Material)

---

Pierre Osselin <sup>\*1</sup>

Henry Kenlay <sup>\*1</sup>

Xiaowen Dong<sup>1</sup>

<sup>1</sup>Department of Engineering Science, University of Oxford, Oxford, UK

## 1 PROOFS OF PROPOSITIONS

### 1.1 PROOF OF PROPOSITION 1

**Disjoint Unions.** Let  $\mathbf{z} \in \mathcal{R}_Q$  and  $\tilde{\mathbf{z}} \in \mathcal{R}_{Q'}$  such that for some  $i \in I$  we have  $Q_i \neq Q'_i$ . If  $\mathbf{z} = \tilde{\mathbf{z}}$ , it implies that  $\|\mathbf{z}_{\mathcal{J}_i} - \mathbf{x}_{\mathcal{J}_i}\| = Q_i$  and  $\|\tilde{\mathbf{z}}_{\mathcal{J}_i} - \mathbf{x}_{\mathcal{J}_i}\| = Q'_i$  which is a contradiction.

**Partition.**  $|\mathcal{J}_i| \leq R_i$ , and  $\|\mathbf{z}_{\mathcal{J}_i} - \mathbf{x}_{\mathcal{J}_i}\| \leq Q_i$  hence  $\mathcal{X} = \cup_{Q \leq R} \mathcal{R}_Q^R$ .

### 1.2 PROOF OF PROPOSITION 2

As the noise for each entry is independent we can decompose the probabilities as so

$$\frac{P(\phi(\tilde{\mathbf{x}}) = \mathbf{z})}{P(\phi(\mathbf{x}) = \mathbf{z})} = \prod_{k \in [N]} \frac{P(\phi(\tilde{\mathbf{x}})_k = \mathbf{z}_k)}{P(\phi(\mathbf{x})_k = \mathbf{z}_k)}. \quad (1)$$

Furthermore, as each components belongs to exactly one edge community.

$$\prod_{k \in [N]} \frac{P(\phi(\tilde{\mathbf{x}})_k = \mathbf{z}_k)}{P(\phi(\mathbf{x})_k = \mathbf{z}_k)} = \prod_{i=1}^I \prod_{k \in \mathcal{C}_i} \frac{P(\phi(\tilde{\mathbf{x}})_k = \mathbf{z}_k)}{P(\phi(\mathbf{x})_k = \mathbf{z}_k)}. \quad (2)$$

We note that for  $k$  where  $\tilde{\mathbf{x}}_k = \mathbf{x}_k$  this fraction is one, so we can focus on terms when  $\tilde{\mathbf{x}}_k \neq \mathbf{x}_k$ . In equations this can be written as

$$\prod_{i=1}^I \prod_{k \in \mathcal{C}_i} \frac{P(\phi(\tilde{\mathbf{x}})_k = \mathbf{z}_k)}{P(\phi(\mathbf{x})_k = \mathbf{z}_k)} = \prod_{i=1}^I \prod_{k \in \mathcal{J}_i} \frac{P(\phi(\tilde{\mathbf{x}})_k = \mathbf{z}_k)}{P(\phi(\mathbf{x})_k = \mathbf{z}_k)} \quad (3)$$

We can consider what the terms are equal to when  $\mathbf{x}_k = \mathbf{z}_k$  and when  $\mathbf{x}_k \neq \mathbf{z}_k$  (assuming that  $\mathbf{x}_k \neq \tilde{\mathbf{x}}_k$ ). We get

$$\frac{P(\phi(\tilde{\mathbf{x}})_k = \mathbf{z}_k)}{P(\phi(\mathbf{x})_k = \mathbf{z}_k)} = \begin{cases} \frac{p_i}{1-p_i} & \text{if } \mathbf{x}_k = \mathbf{z}_k \text{ and } \mathbf{x}_k \neq \tilde{\mathbf{x}}_k \\ \frac{1-p_i}{p_i} & \text{if } \mathbf{x}_k \neq \mathbf{z}_k \text{ and } \mathbf{x}_k \neq \tilde{\mathbf{x}}_k \end{cases}. \quad (4)$$

In total there are  $R_i$  terms in each product, of which  $Q_i$  are the first case and  $R_i - Q_i$  are in case two. Thus

---

<sup>\*</sup>Equal contribution.

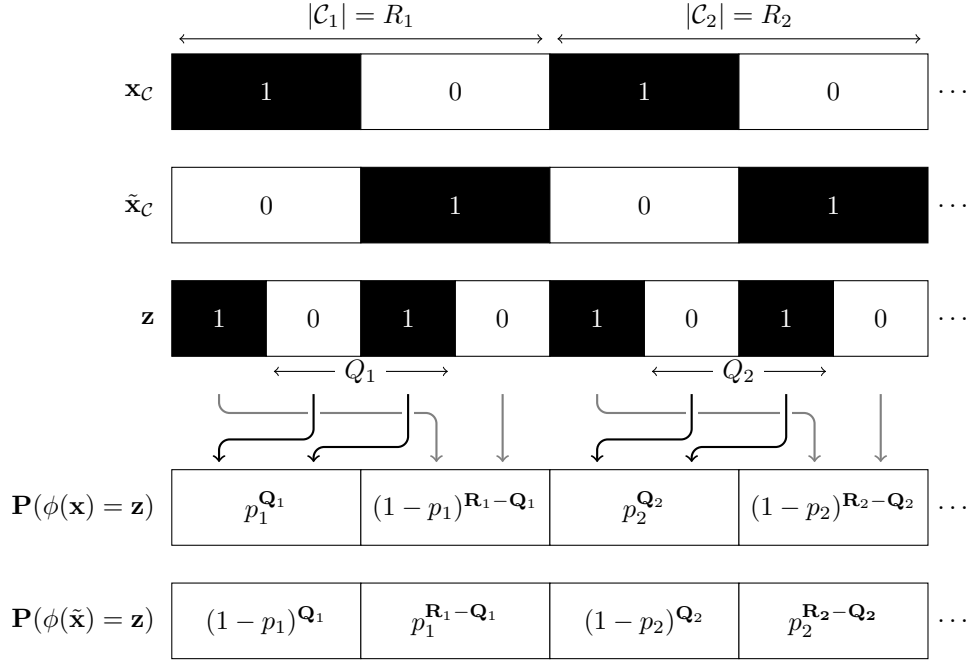

Figure 1: Pictorial representation of where the terms in Proposition 2 come from.

$$\prod_{i=1}^I \prod_{k \in \mathcal{J}_i} \frac{P(\phi(\tilde{\mathbf{x}})_k = \mathbf{z}_k)}{P(\phi(\mathbf{x})_k = \mathbf{z}_k)} = \prod_{i=1}^I \left( \frac{p_i}{1-p_i} \right)^{Q_i} \left( \frac{1-p_i}{p_i} \right)^{R_i-Q_i} \quad (5)$$

$$= \prod_{i=1}^C \left( \frac{p_i}{1-p_i} \right)^{2Q_i-R_i} \quad (6)$$

$$= \prod_{i=1}^C \left( \frac{1-p_i}{p_i} \right)^{R_i-2Q_i} \quad (7)$$

as required. We provide Fig. 1 as a visual aid to the proof.

### 1.3 PROOF OF PROPOSITION 3

We have  $\mathcal{R}_Q = \{\mathbf{z} \in \mathcal{X} : \|\mathbf{z}_{\mathcal{J}_i} - \mathbf{x}_{\mathcal{J}_i}\|_0 = Q_i\}$ . The probability  $\mathbb{P}(\phi(\mathbf{x}) \in \mathcal{R}_Q)$  corresponds to each set  $R_i$  having  $Q_i$  entries not being flipped or equivalently  $R_i - Q_i$  entries being flipped. Each node pair is flipped with a probability of  $p_i$ . Since all flips are independent we can express the probability as  $\mathbb{P}(\phi(\mathbf{x}) \in \mathcal{R}_Q) = \prod_{i=1}^C \text{Bin}(R_i - Q_i | R_i, p_i)$ .

## 2 IMPLEMENTATION

### 2.1 NOISE SAMPLING

In order to sample from the anisotropic noise defined in eq. (11), we propose an illustration in Fig. 2. Given disjoint regions of node pairs  $\mathcal{C}_i$ , new graphs are sampled by adding independent Bernoulli samples with parameters given by the regions to the appropriate part of the graph.

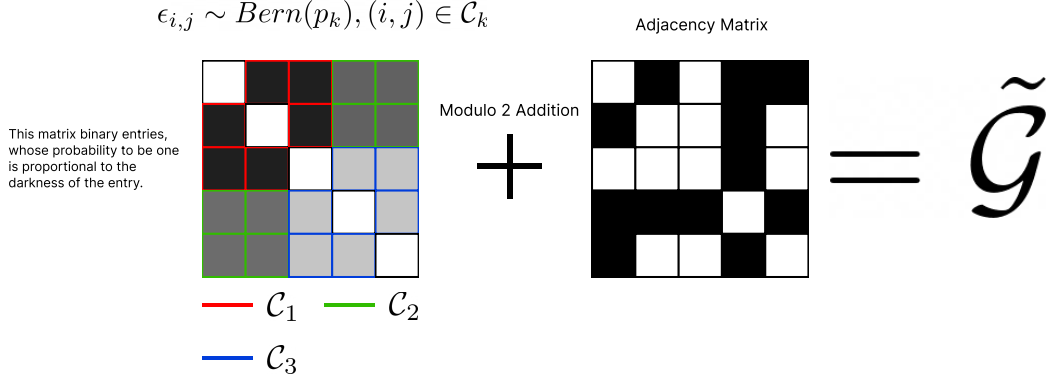

Figure 2: A comparison between the anisotropic certificate and the sparsity-aware certificate. Each entry represents the ratio of correctly classified test-set samples that could be certified at a specified number of edge deletions and additions.

## 2.2 ESTIMATIONS OF PROBABILITIES

The quantities  $p_y(\mathbf{x})$  cannot be computed in closed form for general  $f$ . Hence, we resolve to lower bound  $p_A$  and upper bound  $p_y(\mathbf{x}), y \neq c_A$  via sampling. To achieve this, we use the Clopper-Pearson interval. Cai [2005].

## 2.3 SYMMETRIES CERTIFICATION

Solving the optimization problem defined in Eq. (8) is difficult as certificates have to be computed for every  $\tilde{\mathbf{x}}$  in the ball around  $\mathbf{x}$ :  $\mathcal{B}_r(\mathbf{x})$ . However, in practice,  $\Phi_{\mathbf{x},\tilde{\mathbf{x}}}(p_A, c_A)$  displays some symmetries depending on the noise distribution  $\phi(\mathbf{x})$ .

In the case of isotropic noise, the regions  $\mathcal{H}_k$  and values  $\eta_k$  only depends on  $\|\mathbf{x} - \tilde{\mathbf{x}}\|_0$ . This implies  $\Phi_{\mathbf{x},\tilde{\mathbf{x}}}(p_A, c_A) = \Phi_{\mathbf{x},\tilde{\mathbf{x}}'}(p_A, c_A)$  for all  $\tilde{\mathbf{x}}, \tilde{\mathbf{x}}' \in \mathcal{S}_r(\mathbf{x})$  which reduce the search on every spheres.

In the case of anisotropic noise, the regions  $\mathcal{H}_k$  and values  $\eta_k$  only depends on  $\|\mathbf{x}_{\mathcal{C}_i} - \tilde{\mathbf{x}}_{\mathcal{C}_i}\|_0$ . This implies  $\Phi_{\mathbf{x},\tilde{\mathbf{x}}}(p_A, c_A) = \Phi_{\mathbf{x},\tilde{\mathbf{x}}'}(p_A, c_A)$  for all  $\tilde{\mathbf{x}}, \tilde{\mathbf{x}}' \in \mathcal{S}_{\mathbf{R}}(\mathbf{x})$ .

## 3 ALGORITHM

The full algorithm of our method is given in Alg. 1 and its complexity is analyzed below.

### 3.1 ALGORITHMIC COMPLEXITY: CERTIFICATION

Let  $\mathbf{x}$  be a graph,  $N$  the number of samples to perform the Clopper-Pearson statistical test,  $n$  the number of nodes in the graph, and  $\mathbf{R} \in \prod_i |\mathcal{C}_i|$  a given radius to certify. The certification algorithm proceeds as follow:

1. Sample  $N$  graphs from the noise distribution with complexity  $\mathcal{O}(Nn^2)$ , this step is very easily parallelizable.
2. Forward the  $N$  sampled graphs through the model. Given a model forward complexity of  $\mathcal{O}(m(n))$  (we omit potential dependency on node or edge feature dimension), the total complexity is  $\mathcal{O}(Nm(n))$ , this step is very easily parallelizable.
3. From estimates  $(p_A, p_B)$  and noise distribution  $\epsilon$  find optimal radius  $\mathbf{R}$ . and  $T_{\mathbf{R}} = \prod_i (R_i + 1)$ :
  - (a) Compute the vectors  $\eta_{\mathbf{Q}}^{\mathcal{R}}$  and sort them, with respective complexity  $\mathcal{O}(CT_{\mathbf{R}})$  and  $\mathcal{O}(T_{\mathbf{R}} \log(T_{\mathbf{R}}))$ .
  - (b) Solve the linear programs of eq. (9) and (10) and verify  $\rho_{\mathbf{x},\tilde{\mathbf{x}}}(p_A, c_A) - \bar{\rho}_{\mathbf{x},\tilde{\mathbf{x}}}(p_B, c_B) > 0$ , with complexity  $\mathcal{O}(T)$

The total complexity becomes  $\mathcal{O}(Nn^2 + Nm(n) + CT_{\mathbf{R}} + T_{\mathbf{R}} \log(T_{\mathbf{R}}))$

Regarding the model complexity, some example complexity are the following:

1. Graph Neural Network: the complexity is quadratic in the number of nodes due to matrix multiplication:  $m(n) = \mathcal{O}(n^2)$
2. Label kernel: the complexity is linear in the number of edges  $\mathcal{O}(\mathcal{E}) = \mathcal{O}(n^2)$

---

**Algorithm 1** Structure aware randomized smoothing

---

1: **inputs:** Graph to certify  $\mathbf{x}$ , noise perturbation  $\epsilon$ , anisotropic structure  $(\mathcal{C}_i)_{i \in I} \subset [n]^2$ , graph classification model  $m : \mathcal{X} \rightarrow \mathcal{Y}$ , number of samples  $N$  and upper bounds on certificate radii  $(\mathbf{R}_{max,i})_{i \in I}$ .

2: **initialize:** Train model  $m$  on classification data  $\mathcal{D}$  or load model parameters.

3: **voting**

4:   **for**  $i = 1, \dots, N$  **do**

5:     Sample random graph  $\tilde{\mathbf{x}}_i \sim \mathbf{x} \oplus \epsilon$

6:     Compute model prediction  $y_i \in \mathcal{Y}$

7:   **end for**

8:   Compute distribution label frequency from  $(y_i)_{i \in [N]}$ , denoted  $(p_y, y)_{y \in \mathcal{Y}}$ , and identify the most frequent and runner-up (second most frequent) class  $(p_A, c_A)$  and  $(p_B, c_B)$

9: **certification**

10:   **for**  $\mathbf{R} \in \prod_i [|\mathbf{R}_{max,i}|]$  **do**

11:     Compute  $\eta_{\mathbf{Q}}^{\mathcal{R}}$  according to the formula (13) and sort them.

12:     Compute  $\mathbb{P}(\phi(\mathbf{x})) \in \mathcal{R}_{\mathbf{Q}}$  with formula (14).

13:     Solve the linear programs described in eq. (9) and (10) greedily

14:     Verify  $\underline{\rho}_{\mathbf{x}, \tilde{\mathbf{x}}}(p_A, c_A) - \overline{\rho}_{\mathbf{x}, \tilde{\mathbf{x}}}(p_B, c_B) > 0$

15:   **end for**

16: **return** Grid of certification for  $\mathbf{R} \in \prod_i [|\mathbf{R}_{max,i}|]$

---

### 3.2 ALGORITHMIC COMPLEXITY: OPTIMAL RADIUS

Let  $\mathbf{x}$  be a graph,  $N$  the number of samples to perform the Clopper-Pearson statistical test,  $n$  the number of nodes in the graph. The algorithm to find the optimal radius proceeds as follow:

1. Sample  $N$  graphs from the noise distribution with complexity  $\mathcal{O}(Nn^2)$ , this step is very easily parallelizable.
2. Forward the  $N$  sampled graphs through the model. Given a model forward complexity of  $\mathcal{O}(m(n))$  (we omit potential dependency on node or edge feature dimension), the total complexity is  $\mathcal{O}(Nm(n))$ , this step is very easily parallelizable.
3. From estimates  $(p_A, p_B)$  and noise distribution  $\epsilon$  find optimal radius  $\mathbf{R}$ . Select a vector,  $\mathbf{R} \in \prod_i [|\mathcal{C}_i|]$ , let  $T_{\mathbf{R}} = \prod_i (R_i + 1)$  and  $T = \prod_i (R_{i,max} + 1)$ :
  - (a) Compute the vectors  $\eta_{\mathbf{Q}}^{\mathcal{R}}$  and sort them, with respective complexity  $\mathcal{O}(CT_{\mathbf{R}})$  and  $\mathcal{O}(T_{\mathbf{R}} \log(T_{\mathbf{R}}))$ .
  - (b) Solve the linear programs of eq. (9) and (10) and verify  $\underline{\rho}_{\mathbf{x}, \tilde{\mathbf{x}}}(p_A, c_A) - \overline{\rho}_{\mathbf{x}, \tilde{\mathbf{x}}}(p_B, c_B) > 0$ , with complexity  $\mathcal{O}(T)$

We output the pareto front  $\mathbf{R}$  according to the partial ordering  $\mathbf{R} \preceq \mathbf{R}' \iff \forall i, \mathbf{R}_i \leq \mathbf{R}'_i$

The total naive complexity is  $\mathcal{O}(Nn^2 + Nm(n) + CT^2 + T^2 \log(T))$ . However, we want to point out there are multiple places the complexity could drastically improve.

1. First, the last point is problem agnostic, meaning that, given the estimates  $(p_A, p_B)$  (first and second highest label probabilities) and the noise distribution  $\epsilon$ , the corresponding optimal radii  $\mathbf{R}$  can be computed. Given specific scenario, this opens the possibility to precompute tables  $\mathbf{R}(p_A, p_B, \epsilon)$ . This can be used to directly output  $\mathbf{R}$  or use it to find the optimal  $\mathbf{R}$  quicker.
2. Second, the linear program described in equation (9) and (10) can be efficiently solved greedily. Given we know the closed-form formula for  $\mu_k$ , making the ordering explicitly dependant on  $\mathbf{Q}$ , one can compute them only when necessary.
3. Finally, the partial ordering defined previously is, in practice indicative of the robustness certification, i.e. if we cannot certify a certain radius, a larger radius won't be certified either. Although we don't propose a formal proof of this property, it holds true in practice, as one can see on the experiment results, and could be exploited for more efficient search, similar to a multidimensional binary search.

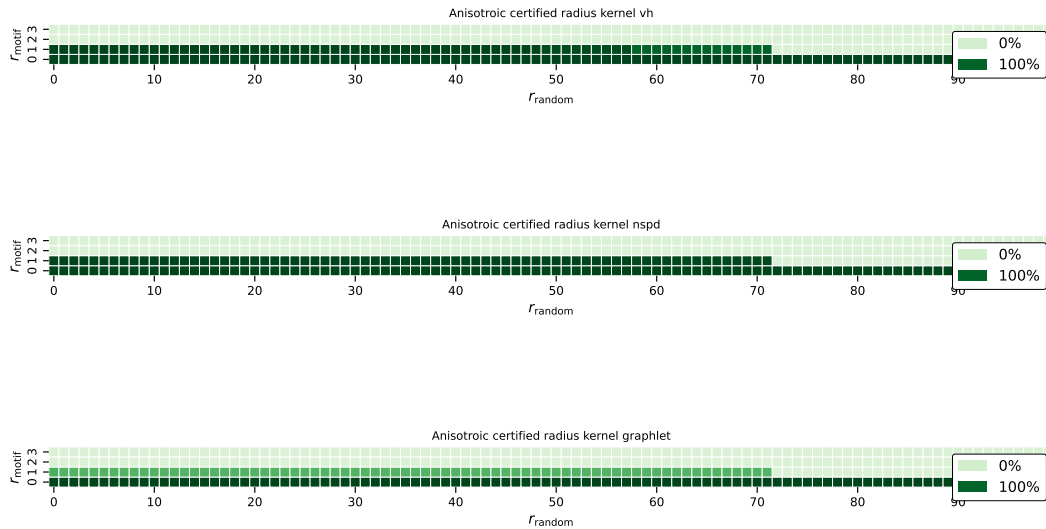

Figure 3: Influence of the underlying classifier on the anisotropic certificate radius.

## 4 ADDITIONAL RESULTS

**Varying the base classifier** In Figure 3, we compare our anisotropic certification performance across three kernels, the graphlet Sampling kernel Shervashidze et al. [2009], the neighbourhood subgraph pairwise distance kernel Costa and De Grave [2010] and vertex Histogram kernels Sugiyama and Borgwardt [2015] for a sample size of  $N = 10,000$ . In general, a model that is robust to noise will lead to certificates with large radii.

**Number of sampled perturbations** In Figure 4, we analysed the impact of sample size when computing the anisotropic certification radius in our synthetic experiments. The certificate performs poorly for a small number of samples. This is because the lower bound on  $p_A$  becomes very loose.

### References

- T Tony Cai. One-sided confidence intervals in discrete distributions. *Journal of Statistical planning and inference*, 131(1): 63–88, 2005.
- Fabrizio Costa and Kurt De Grave. Fast neighborhood subgraph pairwise distance kernel. In *Proceedings of the 26th International Conference on Machine Learning*, pages 255–262. Omnipress; Madison, WI, USA, 2010.
- Nino Shervashidze, SVN Vishwanathan, Tobias Petri, Kurt Mehlhorn, and Karsten Borgwardt. Efficient graphlet kernels for large graph comparison. In *Artificial intelligence and statistics*, pages 488–495. PMLR, 2009.
- Mahito Sugiyama and Karsten Borgwardt. Halting in random walk kernels. *Advances in neural information processing systems*, 28, 2015.

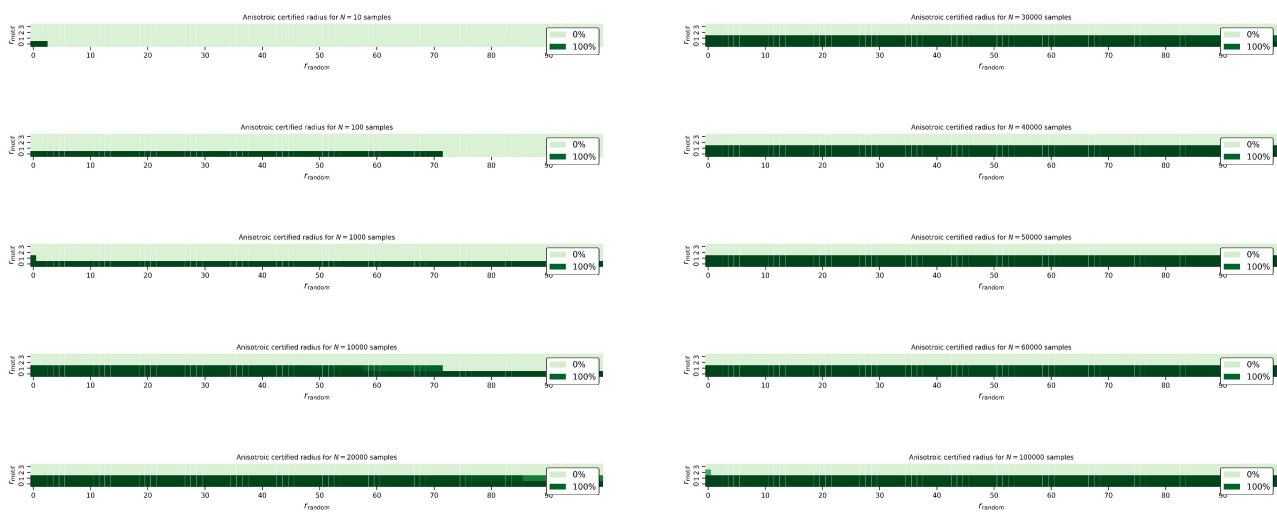

Figure 4: Influence of sample size on anisotropic certificate radius.
