# Supplementary material
Source: ML conference proceedings conference paper supplement (https://openreview.net/forum?id=2ulXbPXISP)

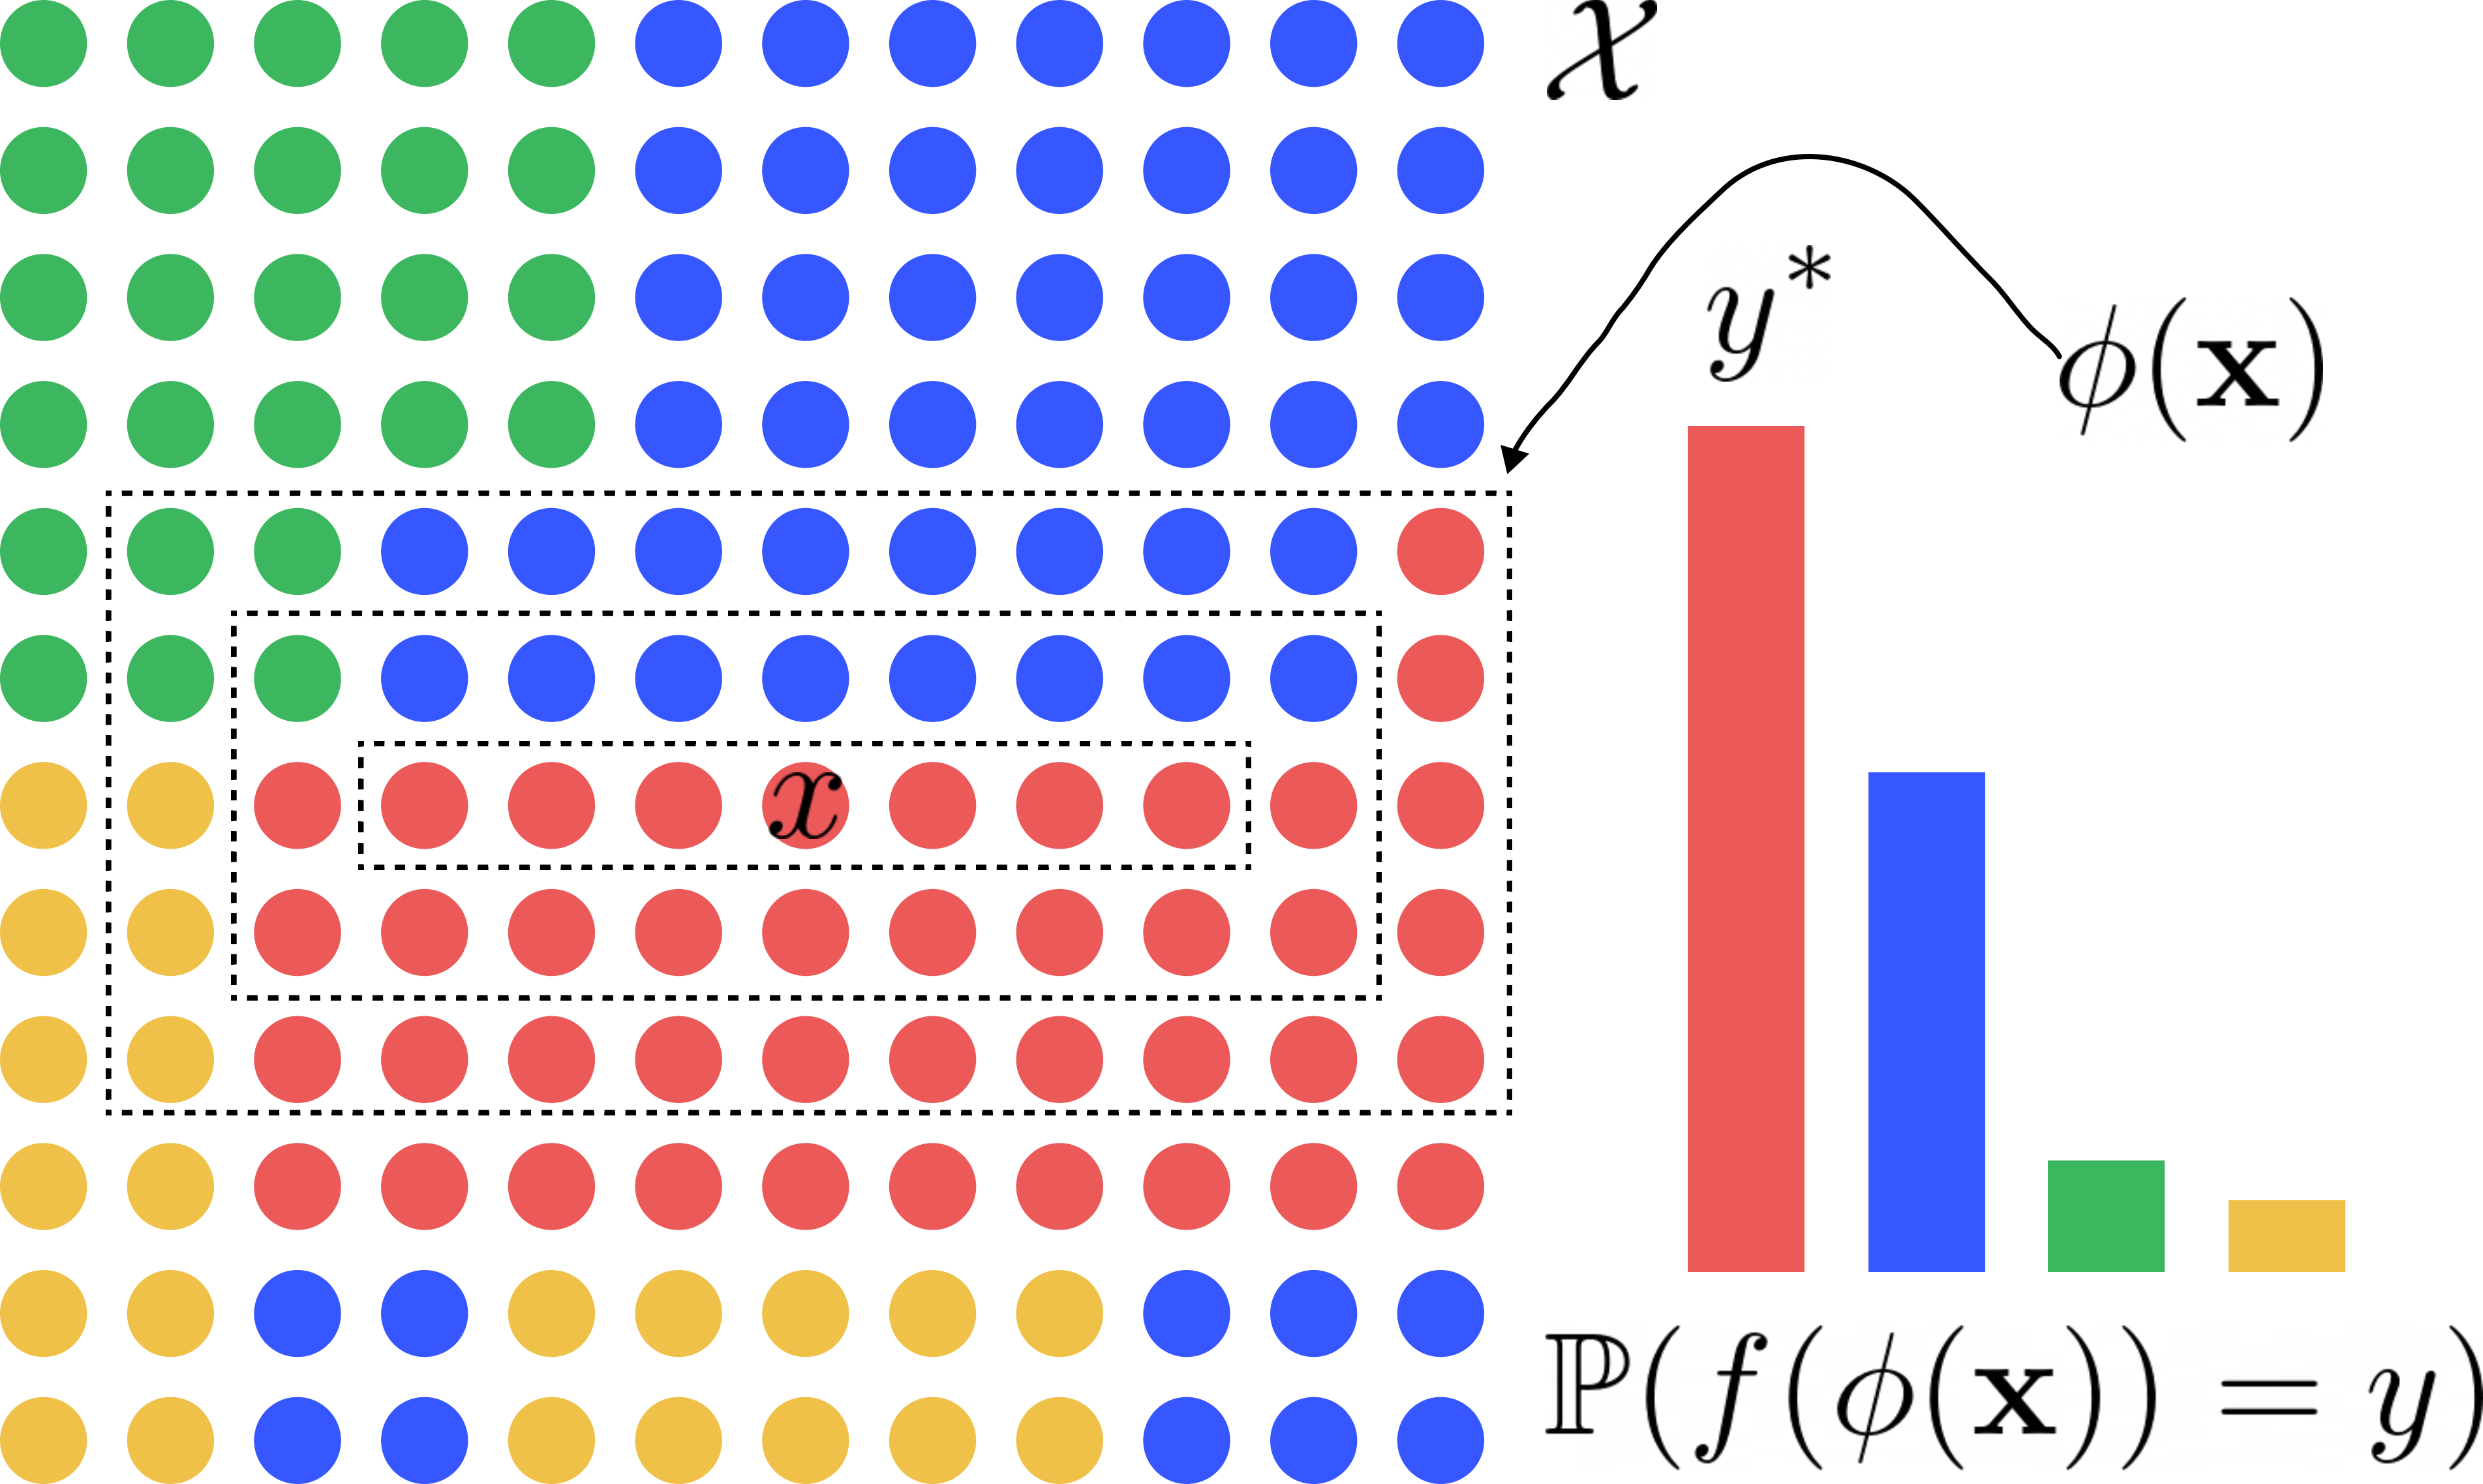

Supplement: supplementary_material [file attachment]

Lower bound error for  $p_{True} = 1$ .

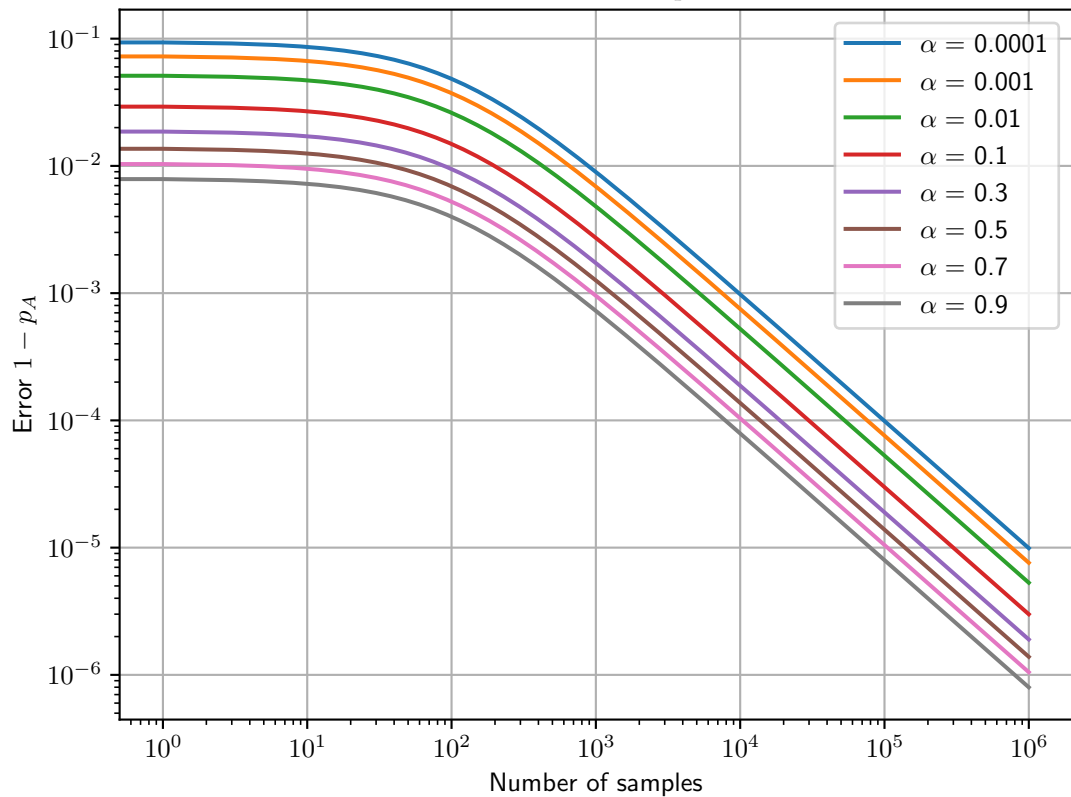

Supplement: supplementary_material [file attachment]

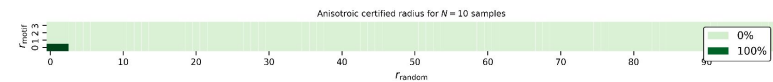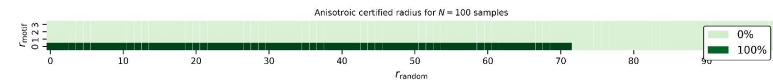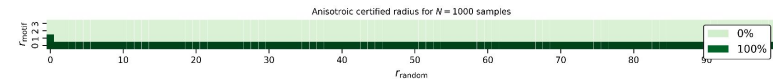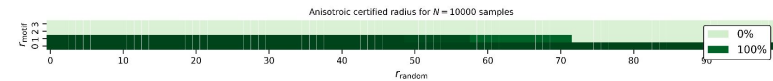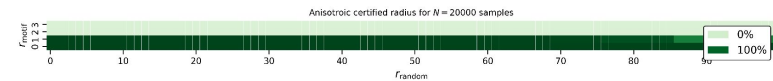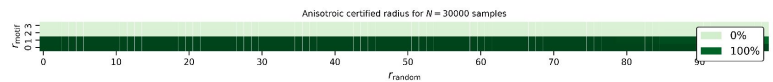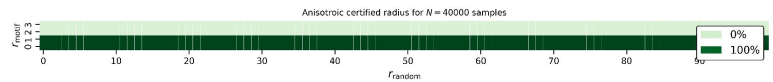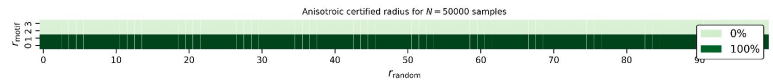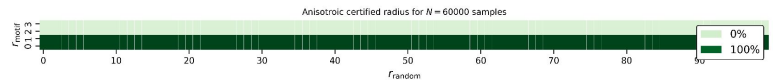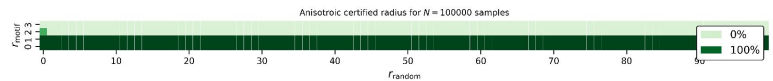

Supplement: supplementary_material [file attachment]

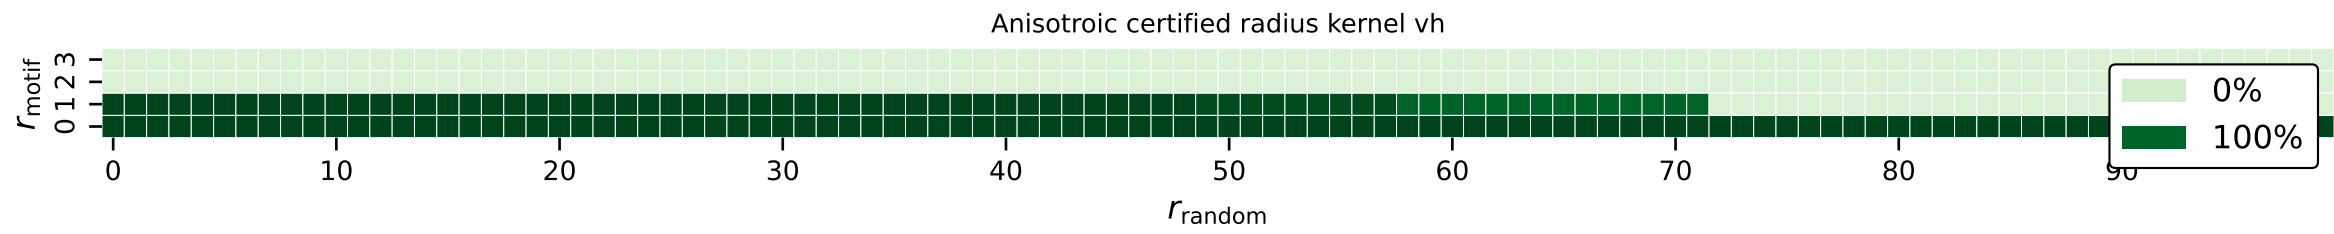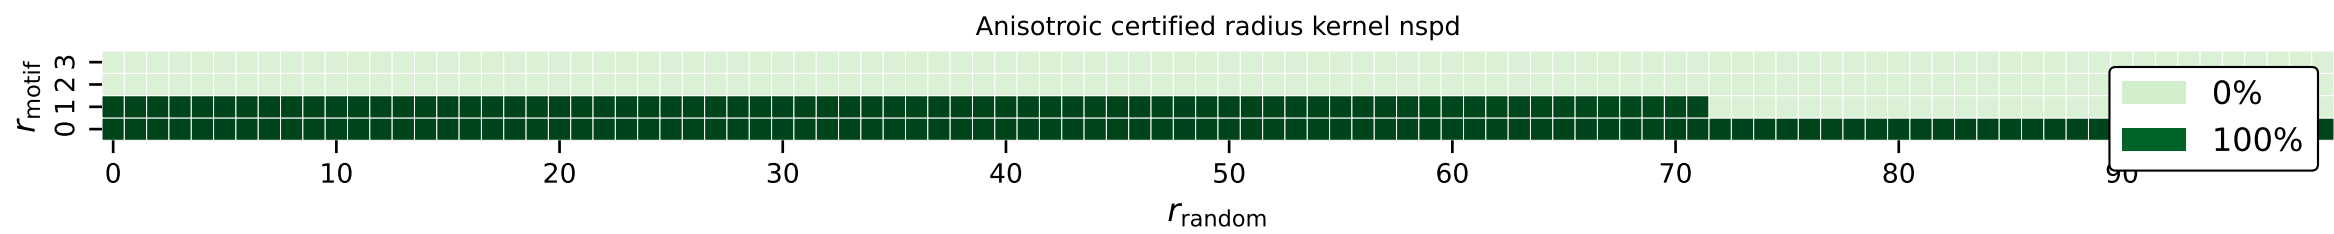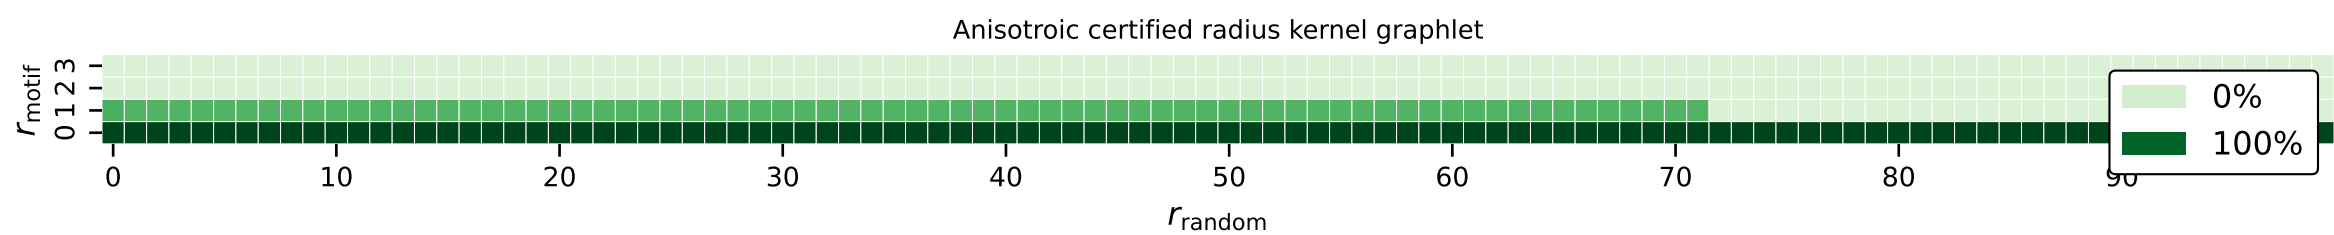

Supplement: supplementary_material [file attachment]

Classification accuracy required for certification

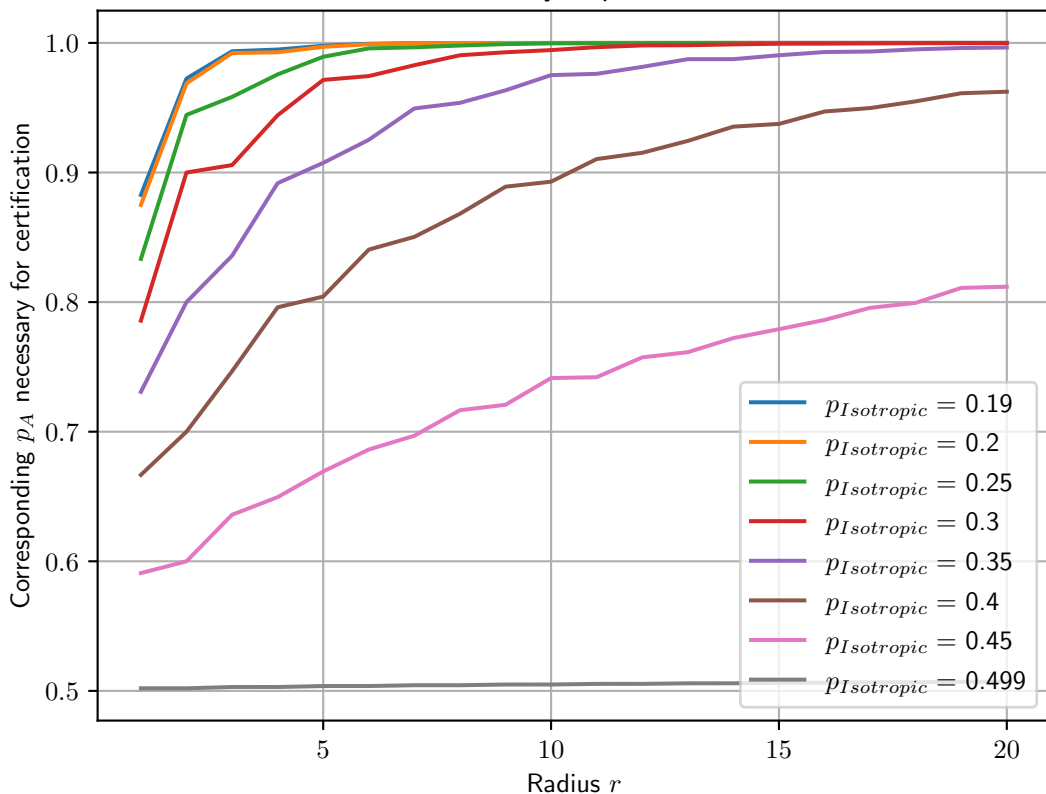

Supplement: supplementary_material [file attachment]

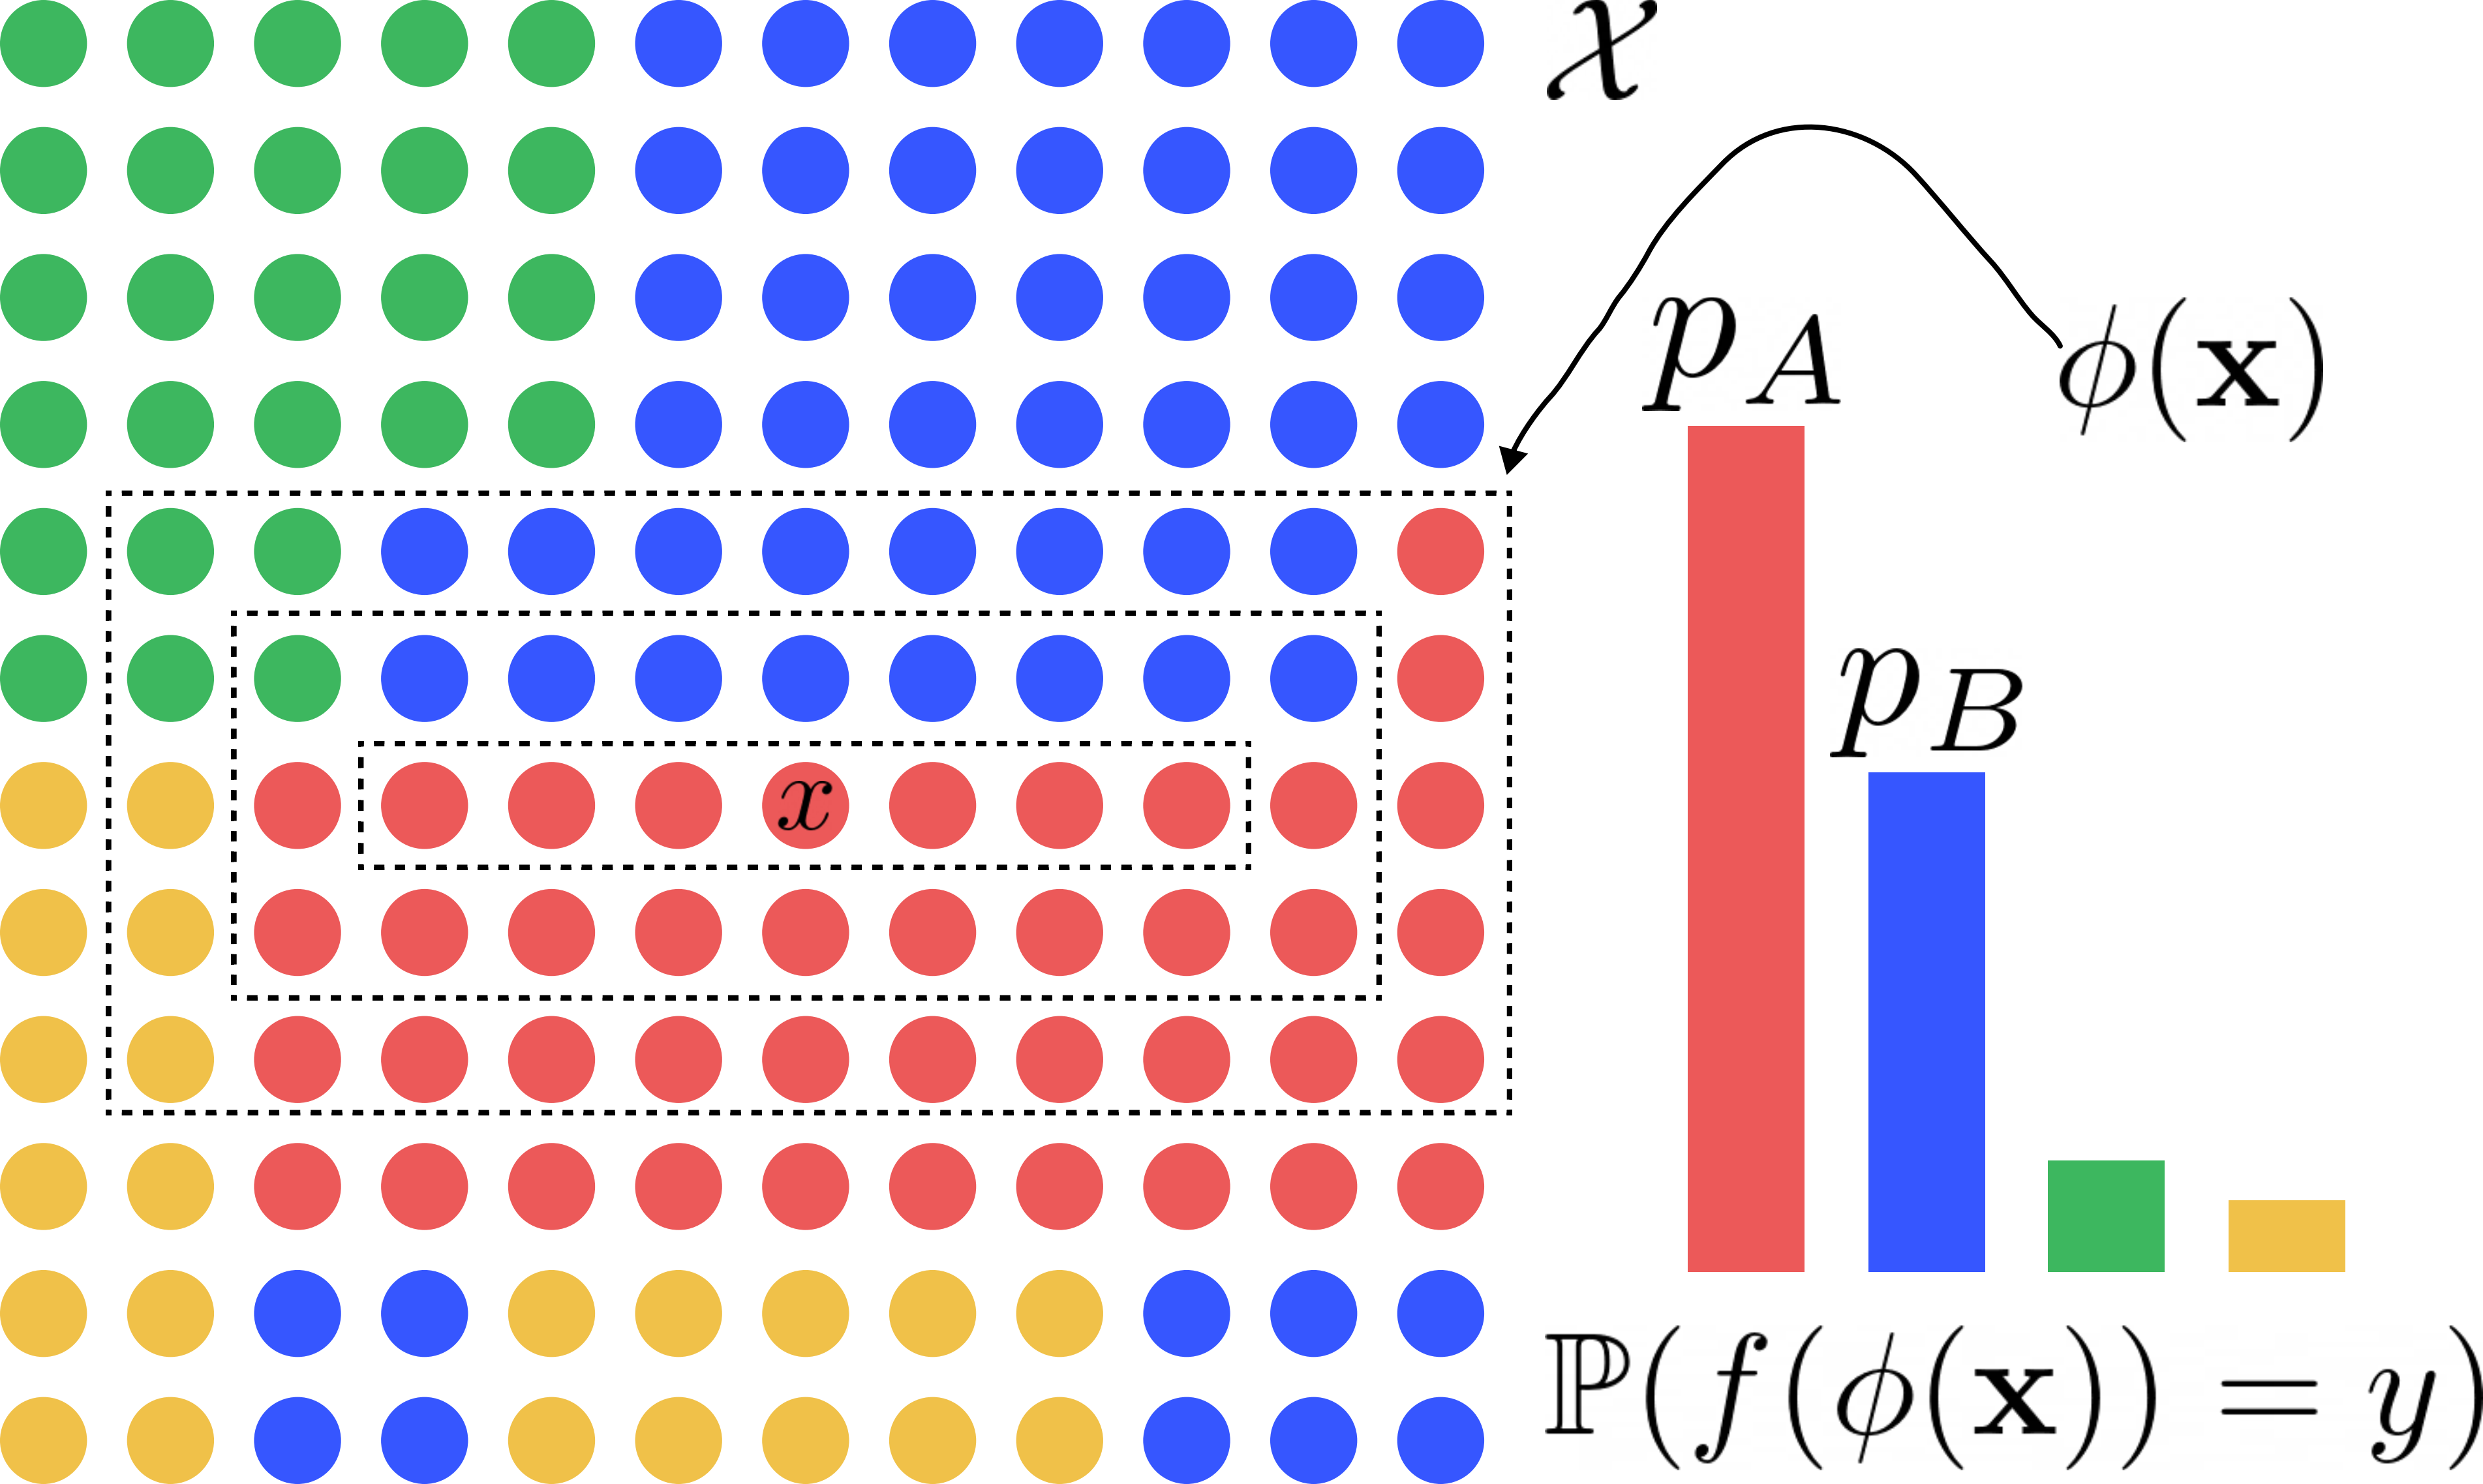

Supplement: supplementary_material [file attachment]
